# Supplementary material for: Activation of protein kinase CK2 attenuates FOXO3a functioning in a PML-dependent manner: implications in human prostate cancer
Source: PubMed Central journal article supplement — Cell Death Dis. 2013 Mar 14;4(3):e543–. doi: 10.1038/cddis.2013.63 (PMC3613841; doi:10.1038/cddis.2013.63), 2013-03-14
Supplement: cddis201363x1.pdf [file cddis201363x1.pdf]

Supplementary Information **S-1**: List of all the antibodies, inhibitors, fine chemical reagents and siRNAs used in the study.

## Supplementary Material and Methods: S1

### **Antibodies, siRNAs, Inhibitors and Fine-chemicals used:**

The following antibodies were procured from Abcam (Kendall Square, Cambridge, MA, USA), Anti CK2 (ab70774), Anti PML (ab53773), Anti PHLPP2 (ab71973), Anti FOXO3a (ab47409), Anti pFOXo3a (S253) (ab47285), and Anti VEGF (ab46154).

The following antibodies were procured from Cell Signaling Technology Inc (Trask Lane, Danvers, MA, USA), Anti CK2alpha (#2656), Anti FOXO3a (#2497), Anti GFP (#2956), Anti pAKT(S473) (#4060), Anti Bim (#2819), Anti GAPDH (#5174), Anti Rabbit HRP linked (#7074) and Anti Mouse HRP linked (#7076)

Anti-Goat HRP linked (#A5420) antibody was procured from Sigma-Aldrich (St. Louis, MO, USA)

Anti p27/Kip1 (#554069) antibody was procured from BD Pharmingen (San Jose, CA, USA).

Anti – PML\* (sc966), Anti LaminB (sc160482), Anti Actin (sc1616) and Anti  $\alpha$ -Tubulin (sc5286) antibody was purchased from Santa Cruz Biotechnology Inc (Santa Cruz, CA, USA).

Alexa Fluor® 488 (AF488, green) and Alexa Fluor® 596 (AF596, red) tagged secondary antibodies (mouse, rabbit and goat) (Molecular Probes, Invitrogen, USA) were purchased from Molecular Probes (Life Technologies, Grand Island, NY, USA).

DMSO (D8418), *d* - Sorbitol (S1876) and (S)-(+)-Camptothecin (C9911) was purchased from Sigma (St. Louis, MO, USA). siRNAs against PML (EHU152671), PHLPP2 (SASI\_Hs01\_00116291) were procured from Sigma (St. Louis, MO, USA), while control

siRNA (sc37007), siRNA Dilution Buffer (sc29527), and siRNA Transfection Medium (sc36868) was purchased from Santa Cruz Biotechnology Inc (Santa Cruz, CA, USA).
