# Supplementary material for: Activation of protein kinase CK2 attenuates FOXO3a functioning in a PML-dependent manner: implications in human prostate cancer
Source: PubMed Central journal article supplement — Cell Death Dis. 2013 Mar 14;4(3):e543–. doi: 10.1038/cddis.2013.63 (PMC3613841; doi:10.1038/cddis.2013.63), 2013-03-14
Supplement: cddis201363x2.pdf [file cddis201363x2.pdf]

Supplementary Information **S-2**: List of all the primers used in the study and figure depicting the confirmation of the mutant AKT-S129D by PCR method.

**S-2a**

**List of all the primers used in the study:**

| Symbol               | Purpose          | Sequence                                                                                                   |
|----------------------|------------------|------------------------------------------------------------------------------------------------------------|
| <i>huAKT1</i>        | Cloning          | AF_5'- TATGAATTCACCATGAGCGACGTGGCTATTGTGAAGGAGGG-3'<br>AR_5' - GGCCGTGCCGCTGGCCGAGTAGGAGAAGTGGGGGAAGTG- 3' |
| <i>p27/Kip1</i>      | qRT-PCR          | F_5' – TAATTGGGGCTCCGGCTAACT – 3'<br>R_5' – TTGCAGGTCGCTTCCTTATTC – 3'                                     |
| <i>p21/Waf1/Cip1</i> | qRT-PCR          | F_5' – GCAGACCAGCATGACAGATT – 3'<br>R_3' – GGATTAGGGCTTCCTCTTGA – 3'                                       |
| <i>Bim</i>           | qRT-PCR          | F_5' – CTGCTGTCTCGATCCTCCAGT – 3'<br>R_5' – GTCGTAAGATAACCATTTCGTGGG – 3'                                  |
| <i>PHLPP2</i>        | qRT-PCR          | F_5' – CCAGTTGGAACAGGCTGACG – 3'<br>R_5' – CCAGTGCAGGAAGGACATGG – 3'                                       |
| <i>PML</i>           | qRT-PCR          | F_5' – GATCTCTGCGCTGATGTCG – 3'<br>R_5' – AACATCTTCTGCTCCAACCC – 3'                                        |
| <i>VEGF</i>          | qRT-PCR          | F_5' – TGCAGATTATGCGGATCAAACC – 3'<br>R_5' – TGCATTACATTTGTTGTCTGTAG – 3'                                  |
| <i>huAKT1-S129D</i>  | SDM              | F_5' – GGCTCACCCAGTGACAACGATGGGGCTGAAGAGATGGAG – 3'<br>R_5' – CTCCATCTTTCAGCCCCATCGTTGCTACTGGGTGAGCC – 3'  |
| <i>huAKT1-S129D</i>  | SDM-confirmation | Cf_5' – GGGCTCACCCAGTGACAACGAT – 3'<br>Cr_5' – ACCTCCATCTTTCAGCCCCATC – 3'                                 |
| <i>huAKT1-S129D</i>  | SDM-confirmation | Wf_5' – GTCGGGCTCACCCAGTGACAACGAT – 3'<br>Wr_5' – CACCTCCATCTTTCAGCCCCCTGA – 3'                            |

**S-2b**

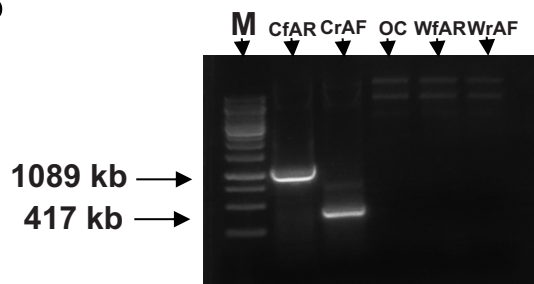

M - Marker  
 CfAR - PCR with Cf primer and AR primer pairs  
 CrAF - PCR with Cr primer and AF primer pairs  
 OC - Original wild-type construct  
 WfAR - PCR with Wf and AR primer pairs  
 WrAF - PCR with Wr and AF primer pairs
