# Supplementary material for: Activation of protein kinase CK2 attenuates FOXO3a functioning in a PML-dependent manner: implications in human prostate cancer
Source: PubMed Central journal article supplement — Cell Death Dis. 2013 Mar 14;4(3):e543–. doi: 10.1038/cddis.2013.63 (PMC3613841; doi:10.1038/cddis.2013.63), 2013-03-14
Supplement: cddis201363x3.pdf [file cddis201363x3.pdf]

**Supplementary Information S-3:** Immuno-fluorescence imaging, coupled with necessary quantification, demonstrating that increase in number of PML-NBs do not differ significantly with increasing duration of CK2 inhibition.

S-3a

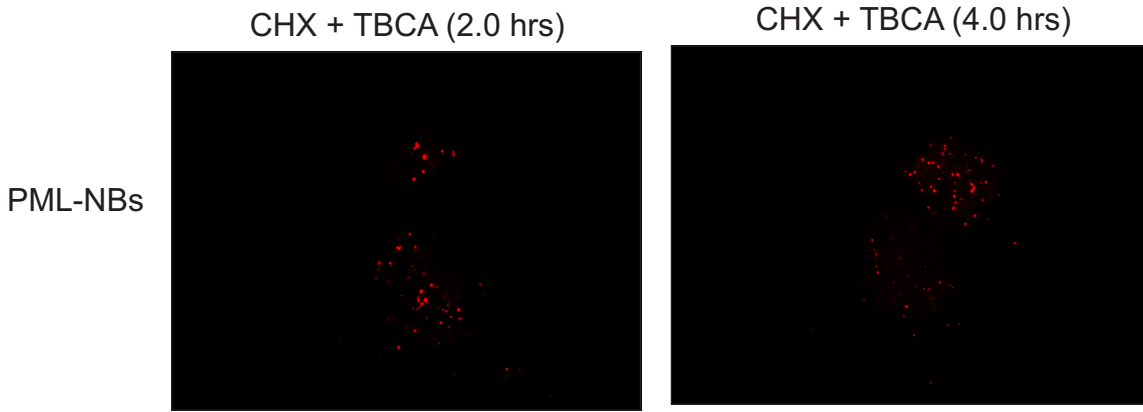

S-3b

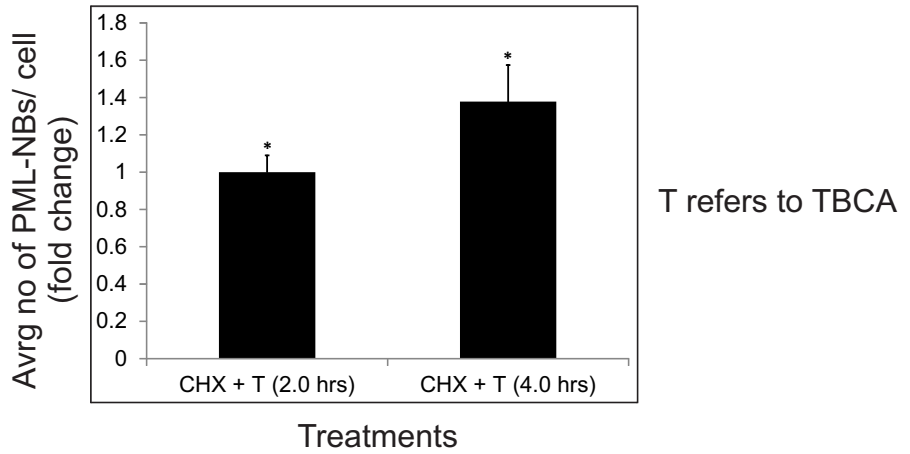

## 1 **Figure Legend\_S3**

2 Numbers of PML-NBs dot not reduce significantly upon increasing the duration of CK2  
3 inhibition with the same dose of inhibitor: **(S-3a)** PC3 cells were treated with TBCA at  
4 two different duration of time as indicated (2.0 hrs and 4.0 hrs). The cells were also  
5 subjected to Cycloheximide treatment (CHX; 25 uM for 4.0 hr) to inhibit the protein  
6 synthesis. Figure is the representative immunofluorescence image depicting number of  
7 PML-NBs (detectable as red dots). Images were captured both at the magnification of  
8 200X and 600X OI, the latter being provided here. **(S-3b)** Quantification of average  
9 number of PML-NBs per cell at the two treatment time points and representation of the  
10 fold change in the average count from 420 cells (nuclei) out of 70 randomly chosen  
11 fields (14 fields from each experiment; number of biologically repeated experiments  
12 being five). Bars represents mean ( $\pm$ ) SD of the three independent biological repeats  
13 with the  $*p = 0.1087$  level of significance, which is not statistically significant.
