# Supplementary material for: Activation of protein kinase CK2 attenuates FOXO3a functioning in a PML-dependent manner: implications in human prostate cancer
Source: PubMed Central journal article supplement — Cell Death Dis. 2013 Mar 14;4(3):e543–. doi: 10.1038/cddis.2013.63 (PMC3613841; doi:10.1038/cddis.2013.63), 2013-03-14
Supplement: cddis201363x6.pdf [file cddis201363x6.pdf]

**Supplementary Information S-6:** High-resolution microscopic images depicting the staining pattern/localization and intensities of the candidate proteins (*viz.* CK2alpha, PML, pAKT(S473), pFOXO3a(S253)) involved in the described signaling axis.

S - 6

A

PCa

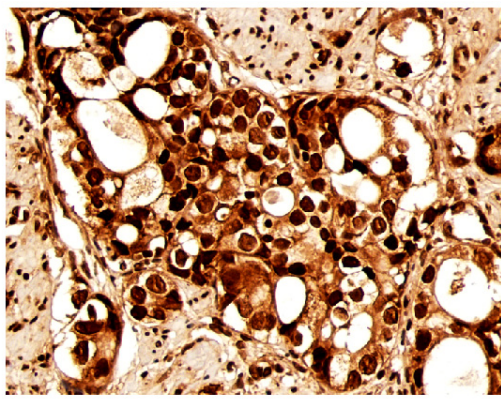

CK2alpha

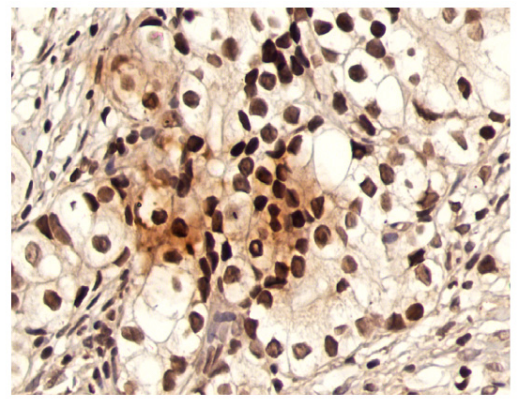

PML

PCa

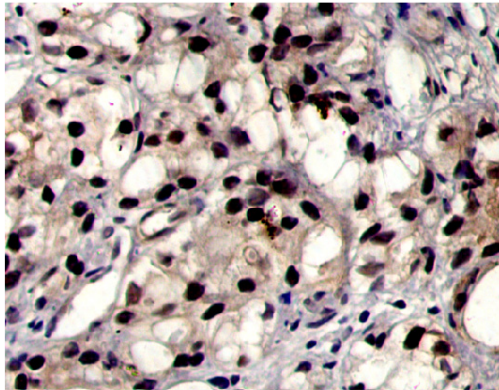

pAKT(S473)

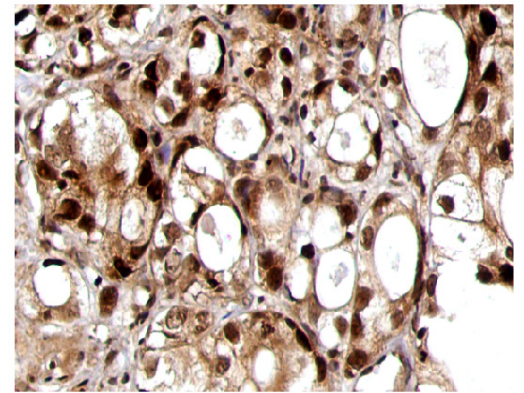

pFOXO3a(S253)

B

PHp

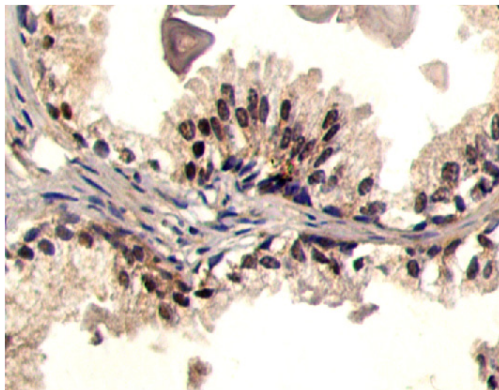

CK2alpha

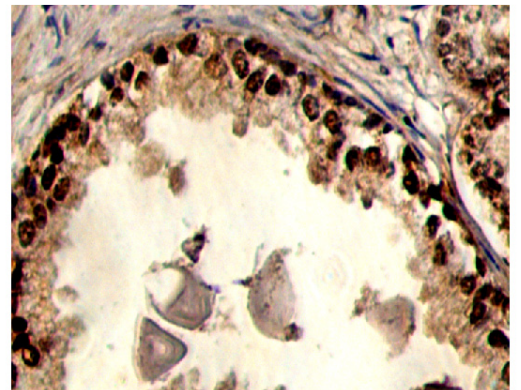

PML

PHp

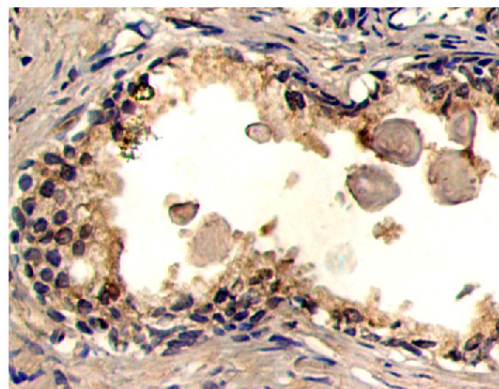

pAKT(S473)

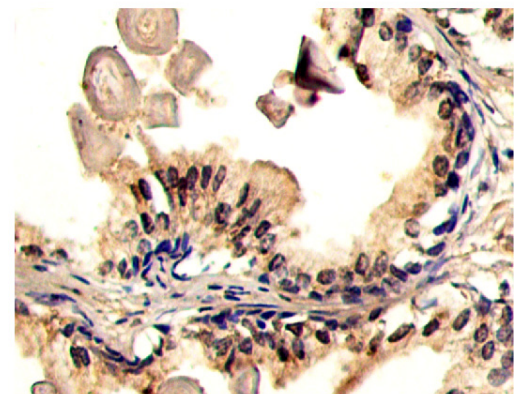

pFOXO3a(S253)

1 **Figure Legend\_S6**

2 Protein Kinase CK2, pAKT(S473) and pFOXO3a(S2530 are up regulated in Human  
3 Prostate Cancer (PCa) with prominent nuclear localizations while PML depicts an  
4 intense nuclear localization in Prostate Hyperplasia (PHp) tissue samples **(A)**  
5 Representative high resolution Immunohistochemistry images of the candidate proteins  
6 involved in the signalling axis, *viz*; CK2alpha, PML, pAKT (S473) and pFOXO3a (S253)  
7 in human PCa tissue samples. **(B)** Representative high resolution  
8 Immunohistochemistry images of the candidate proteins involved in the signalling axis,  
9 *viz*; CK2alpha, PML, pAKT (S473) and pFOXO3a (S253) in human PHp tissue samples.
